# Supplementary material for: Autophagy regulates the therapeutic potential of mesenchymal stem cells in experimental autoimmune encephalomyelitis
Source: PubMed Central journal article supplement — Autophagy. 2014 May 14;10(7):1301–15. doi: 10.4161/auto.28771 (PMC4203554; doi:10.4161/auto.28771), 2014-05-14
Supplement: auto-10-1301-s01.pdf [file auto-10-1301-s01.pdf]

## **Supplemental Material to:**

**Shipeng Dang, Huanbai Xu, Congfeng Xu, Wei Cai, Qian Li, Yiji Cheng, Min Jin, Ru-Xing Wang, Yongde Peng, Yi Zhang, Changping Wu, Xiaozhou He, Bing Wan, and Yanyun Zhang**

**Autophagy regulates the therapeutic potential of mesenchymal stem cells in experimental autoimmune encephalomyelitis**

**Autophagy 2014; 10(7)**

**<http://dx.doi.org/10.4161/auto.28771>**

**[www.landesbioscience.com/journals/autophagy/article/28771](http://www.landesbioscience.com/journals/autophagy/article/28771)**

# Supplemental Figure 1

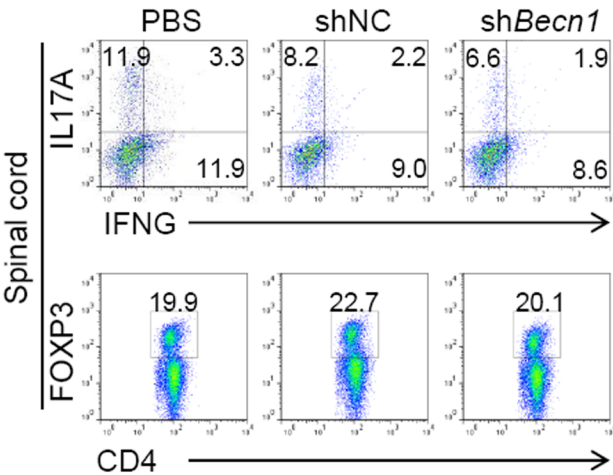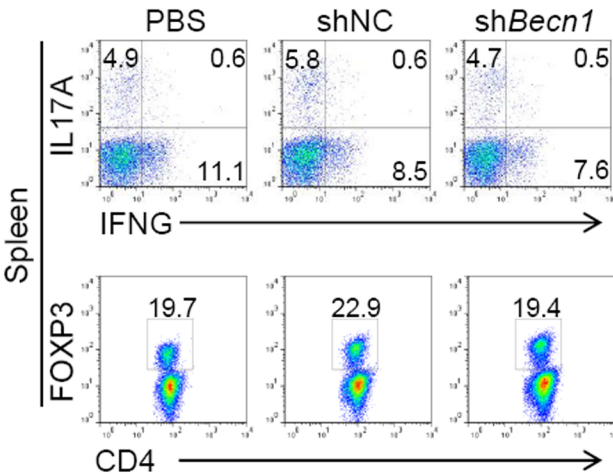

# Supplemental Figure 2

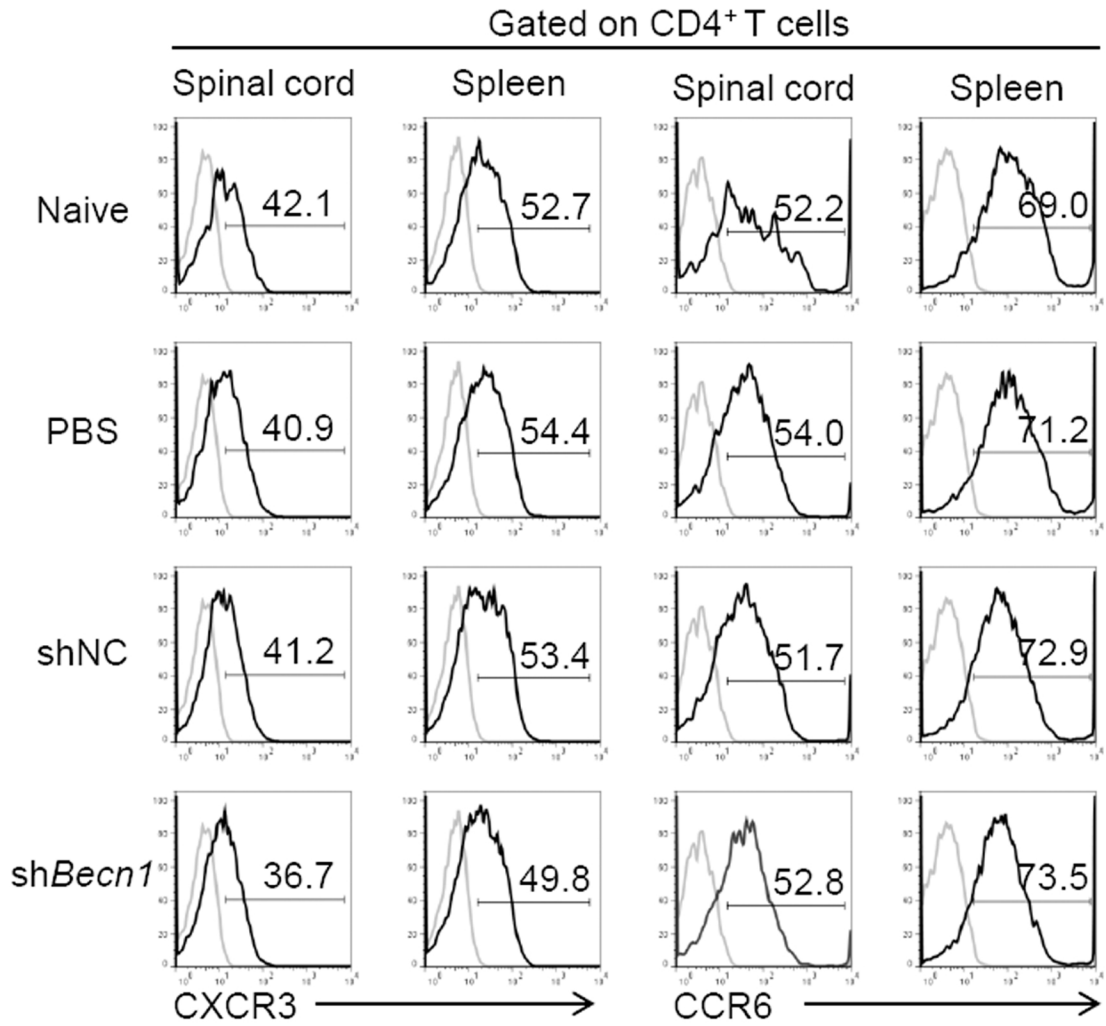

**Figure S1.** Frequencies of Th cells in shNC-MSC- or sh*Becn1*-MSC-treated EAE mice. Intracellular staining of IL17A, IFNG, and FOXP3 in CD4<sup>+</sup> T cells derived from the spinal cords and spleens of PBS-, shNC-MSC- or sh*Becn1*-MSC-treated EAE mice.

**Figure S2.** Expression of CXCR3 and CCR6 on CD4<sup>+</sup> T cells in shNC-MSC- or sh*Becn1*-MSC-treated EAE mice. The levels of CXCR3 and CCR6 on CD4<sup>+</sup> T cells in shNC-MSC- or sh*Becn1*-MSC-treated EAE mice were measured by flow cytometry.

**Supplemental Table 1: Quantitative real-time PCR primers**

| Genes         |                                           | Sequence from 5' to 3' orientation |                         |
|---------------|-------------------------------------------|------------------------------------|-------------------------|
| <i>Becn1</i>  | beclin 1                                  | Forward                            | AGCTGGAGTTGGATGACGAAC   |
|               |                                           | Reverse                            | TGATTGTGCCAAACTGTCCG    |
| <i>Atg5</i>   | autophagy-related<br>(gene) 5             | Forward                            | GCTGCGGTTCACTCTGGTT     |
|               |                                           | Reverse                            | TCGGTCGGGTTCTGTCTGC     |
| <i>Atg7</i>   | autophagy-related<br>(gene) 7             | Forward                            | TGACGAGGAGACTGTCTGAAGC  |
|               |                                           | Reverse                            | CTGGTGAGATGGCACAGGAAA   |
| <i>Ptgs2</i>  | prostaglandin-endop<br>eroxide synthase 2 | Forward                            | GAAGTCTTTGGTCTGGTGCCT   |
|               |                                           | Reverse                            | TGCTCCTGCTTGAGTATGTCG   |
| <i>Nos2</i>   | nitric oxide<br>synthase 2,<br>inducible  | Forward                            | TGGAGCGAGTTGTGGATTGT    |
|               |                                           | Reverse                            | GGGTCGTAATGTCCAGGAAGTA  |
| <i>Tgfb1</i>  | transforming growth<br>factor, beta 1     | Forward                            | CACTGATACGCCTGAGTG      |
|               |                                           | Reverse                            | GTGAGCGCTGAATCGAAA      |
| <i>Il10</i>   | interleukin 10                            | Forward                            | TACAGCCGGGAAGACAATAACT  |
|               |                                           | Reverse                            | CCTGCATTAAGGAGTCGGTTAG  |
| <i>Tnf</i>    | tumor necrosis<br>factor                  | Forward                            | GGTCTGGGCCATAGAACTGA    |
|               |                                           | Reverse                            | CAGCCTCTTCTCATTCTCCTGC  |
| <i>Ifng</i>   | Interferon, gamma                         | Forward                            | TGAGCTCATTGAATGCTTGG    |
|               |                                           | Reverse                            | AGGCCATCAGCAACAACATA    |
| <i>Il6</i>    | interleukin 6                             | Forward                            | TGGTACTCCAGAAGACCAGAGG  |
|               |                                           | Reverse                            | AACGATGATGCACTTGCAGA    |
| <i>Il17a</i>  | interleukin 17a                           | Forward                            | CAAACACTGAGGCCAAGGAC    |
|               |                                           | Reverse                            | CGTGGAACGGTTGAGGTAGTC   |
| <i>Cxcl9</i>  | chemokine (C-X-C<br>motif) ligand 9       | Forward                            | TGCTACACTGAAGAACGGAGATC |
|               |                                           | Reverse                            | CTTCCTTGAACGACGACGACT   |
| <i>Cxcl10</i> | chemokine (C-X-C<br>motif) ligand 10      | Forward                            | GTAAGCTATGTGGAGGTGCG    |
|               |                                           | Reverse                            | GGAAGATGGTGGTTAAGTTTCG  |

---

|               |                                          |         |                      |
|---------------|------------------------------------------|---------|----------------------|
| <i>Cxcl11</i> | <i>chemokine (C-X-C motif) ligand 11</i> | Forward | AGGAAGGTCACAGCCATAGC |
|               |                                          | Reverse | CGATCTCTGCCATTTTGACG |
| <i>Ccl20</i>  | <i>chemokine (C-C motif) ligand 20</i>   | Forward | GGAAGGAAGAGGCGTCTGTA |
|               |                                          | Reverse | ACTCCTGGAGCTGAGAATGG |

---
